# Supplementary figures and images for: Neuronal tissue collection from intra-cranial instruments used in deep brain stimulation surgery for Parkinson’s disease with implications for study of alpha-synuclein
Source: PubMed Central journal article supplement — Sci Rep. 2024 Sep 16;14:21641. doi: 10.1038/s41598-024-72542-5 (PMC11405830; doi:10.1038/s41598-024-72542-5), 2024-09-16

SNL4

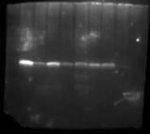

3H11

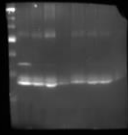

EP1538Y

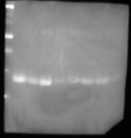

5C1

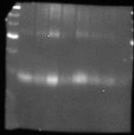

Supplement: 41598_2024_72542_MOESM2_ESM.pdf [file 41598_2024_72542_MOESM2_ESM.pdf]
